# Supplementary material for: Notch and VEGF pathways play distinct but complementary roles in tumor angiogenesis
Source: Vasc Cell. 2013 Sep 25;5:17. doi: 10.1186/2045-824X-5-17 (PMC3849070; doi:10.1186/2045-824X-5-17)
Supplement: Additional file 3 — Genes up/down regulated in NGP-N1D+BV, NGP-N1D, NGP-LacZ+BV tumors. [file 2045-824X-5-17-S3.xlsx]

## Sheet: Sheet1
UP in N1D+BV
	Row	Gene ID	Gene Name	Fold Change	q-value(%)
1	17267	DSG2	217901_at	7.34024	0
2	6099	ZNF85	206572_x_at	4.14323	0
3	18033	RAP2C	218668_s_at	2.68212	0
4	10841	IGH@ /// IGHG1 /// IGHG2 /// IGHM /// IGHV4-31 /// LOC100290146 /// LOC100294459	211430_s_at	6.79179	0
5	12735	ABCA5	213353_at	6.58419	0
6	14696	RUNDC3B	215321_at	3.5115	0
7	132	PRKAR1A	200603_at	2.86625	0
8	18775	TMEM45A	219410_at	2.39008	0
9	17770	SNX10	218404_at	3.54096	0
10	3682	CDO1	204154_at	3.1261	0
11	10191	NPY2R	210729_at	3.75163	0
12	3876	AK3L1	204348_s_at	2.35156	0
13	6384	FKBP1B	206857_s_at	2.76728	0
14	5496	KCNS3	205968_at	3.98954	0
15	20310	MANSC1	220945_x_at	2.03818	0
16	19050	TMEM35	219685_at	3.45742	0
17	7247	POU4F2	207725_at	4.18581	0
18	2149	PLOD2	202620_s_at	2.59742	0
19	16230	---	216859_x_at	2.44058	0
20	7065	P4HA1	207543_s_at	3.39016	0
21	4277	NAP1L3	204749_at	2.2647	0
22	3875	AK3L1	204347_at	2.08975	0
23	12540	---	213156_at	5.41993	0
24	17583	SCPEP1	218217_at	3.15691	0
25	1966	CYP1B1	202437_s_at	2.32316	0
26	1377	BNIP3	201848_s_at	2.18229	0
27	14151	TOX3	214774_x_at	2.46107	0
28	1904	SEC24D	202375_at	2.22566	0
29	2	DDR1	1007_s_at	2.02079	0
30	13228	PRPH	213847_at	5.35854	0
31	1378	BNIP3	201849_at	2.52454	0
32	15994	TOX3	216623_x_at	2.79675	0
33	2238	FMOD	202709_at	3.93642	0
34	20969	HMGN5	221606_s_at	2.76983	0
35	2442	ADM	202912_at	5.28415	0
36	14483	TOX3	215108_x_at	2.47617	0
37	3865	RGS4	204337_at	5.32032	0
38	2579	TTC37	203049_s_at	2.18695	0
39	12542	---	213158_at	5.18214	0
40	9082	BMP7	209591_s_at	2.66527	0
41	17968	HAUS6	218602_s_at	2.11149	0
42	3866	RGS4	204338_s_at	9.51431	0
43	12127	MAOA	212741_at	2.1357	0
44	9385	ITSN2	209898_x_at	2.14841	0
45	16632	RPL15	217266_at	2.01101	0
46	3867	RGS4	204339_s_at	7.08797	0
47	3832	PROM1	204304_s_at	2.92724	0
48	4541	ADORA2A /// CYTSA	205013_s_at	2.74489	0
49	9655	PDLIM3	210170_at	2.22263	0.0347945
50	12019	KIAA0776	212633_at	2.58471	0.0347945
51	2417	DDIT4	202887_s_at	2.54791	0.0347945
52	9081	BMP7	209590_at	3.92808	0.0347945
53	2262	P4HA2	202733_at	2.07548	0.0347945
54	5977	DBH	206450_at	3.71302	0.0347945
55	11885	FCF1 /// MAPK1IP1L	212499_s_at	2.33608	0.0347945
56	6213	PDK1	206686_at	2.04071	0.0347945
57	18276	YEATS4	218911_at	2.00472	0.0347945
58	545	EIF1AX	201016_at	2.30582	0.0347945
59	17217	SLMO2	217851_s_at	2.22073	0.0347945
60	4722	PSPH	205194_at	2.21865	0.0347945
61	4650	TMEFF1	205122_at	2.15216	0.0347945
62	17991	NRN1	218625_at	2.0271	0.0347945
63	833	NDUFA5	201304_at	2.09188	0.0347945
64	5296	SLC27A2	205768_s_at	5.90499	0.0347945
65	194	SPARC	200665_s_at	2.63617	0.0347945
66	21639	LOC285830	222279_at	2.08602	0.0347945
67	5297	SLC27A2	205769_at	5.18376	0.0347945
68	3293	GCA	203765_at	2.3332	0.0347945
69	9983	VEGFA	210512_s_at	2.56494	0.0553421
70	12595	GOLGA6L5 /// GOLGA6L9	213212_x_at	2.36783	0.0553421
71	12084	10-Sep	212698_s_at	2.03375	0.0553421
72	12298	C6orf26	212913_at	3.51685	0.0553421
73	12982	SLIT1	213601_at	2.39513	0.0553421
74	12365	FAM115A	212981_s_at	2.28073	0.0553421
75	4911	ZBTB20	205383_s_at	2.70691	0.0553421
76	21064	BRIP1	221703_at	2.26109	0.0553421
77	14035	TMED7	214658_at	2.41568	0.106178
78	6225	XK	206698_at	2.27186	0.106178
79	20783	---	221419_s_at	2.23825	0.106178
80	10181	ARL17A /// LOC100294341	210718_s_at	2.19022	0.172354
81	4831	KCNJ8	205303_at	2.34951	0.172354
82	7239	PKP2	207717_s_at	2.19971	0.172354
83	9763	ZMYM2	210282_at	2.03784	0.172354
84	841	SH3BGRL	201312_s_at	3.9852	0.172354
85	18975	RGNEF	219610_at	2.62415	0.172354
86	16702	RPS10 /// RPS10P5 /// RPS10P7	217336_at	2.09954	0.172354
87	12053	SPARC	212667_at	2.20452	0.305408
88	21334	---	221973_at	2.34688	0.305408
89	13421	RPL37A	214041_x_at	2.93876	0.305408
90	699	BHLHE40	201170_s_at	2.0504	0.305408
91	17879	C4orf43	218513_at	2.2987	0.305408
92	10519	FOLR1	211074_at	3.11161	0.305408
93	3928	EFS	204400_at	2.13493	0.305408
94	14180	CDH6	214803_at	2.12622	0.305408
95	534	CD9	201005_at	2.76069	0.305408
96	13620	GAL	214240_at	2.10617	0.547898
97	8964	GPM6A	209470_s_at	2.12669	0.547898
98	4123	STC1	204595_s_at	2.59078	0.882782
99	328	HSPA1A	200799_at	6.74865	0.882782
100	8565	RGS5	209070_s_at	3.69434	0.882782
101	15890	---	216518_at	2.12697	0.882782
102	6992	PIR	207469_s_at	2.33721	0.882782
103	4125	STC1	204597_x_at	2.48073	0.882782
104	8566	RGS5	209071_s_at	4.95037	0.882782
105	11685	NRP1	212298_at	2.14638	0.882782
106	1614	TJP2	202085_at	2.16232	0.882782
107	4	HSPA6	117_at	3.2632	0.882782
108	18414	CSGALNACT1	219049_at	2.10082	1.50188
109	12800	HSPA6	213418_at	3.86355	1.50188
110	407	EPAS1	200878_at	2.3447	1.50188
111	17719	RGS5	218353_at	3.47938	2.5382
112	5586	ZNF91	206059_at	2.05752	2.5382
113	193	DNAJB1	200664_s_at	2.06242	2.5382
114	15089	SLC6A2	215715_at	2.26755	2.5382
115	9475	ASCL1	209988_s_at	2.0489	2.5382
DN in N1D+BV
	Row	Gene ID	Gene Name	Fold Change	q-value(%)
1	19105	VASH2	219740_at	0.498909	0
2	6085	SIM2	206558_at	0.310588	0
3	12711	SRGAP2	213329_at	0.303368	0
4	18213	THOC6	218848_at	0.499079	0
5	14616	ANO3	215241_at	0.248061	0
6	3952	LMO3	204424_s_at	0.138034	0
7	9059	RGL1	209568_s_at	0.270256	0
8	18828	C20orf103	219463_at	0.0856105	0
9	12531	HOXA10	213147_at	0.297961	0
10	5222	TYRP1	205694_at	0.111099	0
11	8179	CAPN2	208683_at	0.498623	0
12	8733	STX3	209238_at	0.300342	0
13	13433	ERBB4	214053_at	0.300797	0
14	19135	GTDC1	219770_at	0.465102	0
15	20126	TAOK3	220761_s_at	0.481642	0
16	14040	DSTYK	214663_at	0.465718	0
17	8389	DUSP6	208893_s_at	0.321277	0
18	13818	HLX	214438_at	0.226428	0
19	8544	ZMYND8	209049_s_at	0.488047	0
20	19287	LTBP3	219922_s_at	0.436961	0
21	5857	SHC3	206330_s_at	0.327126	0
22	17710	RCOR3	218344_s_at	0.440424	0
23	6925	PROX1	207401_at	0.469907	0
24	12650	CAMTA1	213268_at	0.373915	0
25	7079	RYR2	207557_s_at	0.419994	0
26	18227	ASB13	218862_at	0.481858	0
27	13225	HOXA5	213844_at	0.437865	0
28	9501	MAP2	210015_s_at	0.487447	0
29	12990	SEZ6L	213609_s_at	0.473398	0
30	3447	TCEA2	203919_at	0.447433	0
31	19298	GLRX2	219933_at	0.478636	0
32	11528	MCM4	212141_at	0.427511	0
33	18731	AVEN	219366_at	0.483315	0
34	2952	IGFBP5	203424_s_at	0.279905	0
35	18148	INTS7	218783_at	0.488795	0
36	14030	HOXA9	214651_s_at	0.420102	0
37	6671	CITED1	207144_s_at	0.430877	0
38	10012	PRKDC	210543_s_at	0.494698	0
39	16498	---	217130_at	0.190849	0
40	18064	RAB7L1	218699_at	0.427457	0
41	7477	C6orf54	207963_at	0.362263	0
42	714	HTRA1	201185_at	0.45403	0
43	12720	TMEM158	213338_at	0.471789	0
44	5451	RELN	205923_at	0.182981	0
45	5174	PAX6	205646_s_at	0.438826	0
46	12534	HOXA10	213150_at	0.143565	0
47	18754	SUSD4	219389_at	0.367177	0
48	1851	GGPS1	202322_s_at	0.462646	0
49	17473	WDR26	218107_at	0.492406	0
50	22010	HEY1	44783_s_at	0.452742	0
51	11347	IGFBP5	211959_at	0.290532	0
52	4130	DKK1	204602_at	0.11303	0
53	1800	FBXO28	202271_at	0.454608	0
54	8388	DUSP6	208892_s_at	0.238083	0
55	1435	CTDSPL	201906_s_at	0.471167	0
56	9273	JAG2	209784_s_at	0.479382	0
57	5265	KCNQ2	205737_at	0.474187	0
58	13204	HOXA11	213823_at	0.390318	0
59	3325	VSNL1	203797_at	0.410182	0
60	12281	ABR	212895_s_at	0.436197	0
61	15131	PRKDC	215757_at	0.471089	0
62	12000	ARID5B	212614_at	0.351985	0
63	12414	PLXNA2	213030_s_at	0.465045	0
64	13675	KIAA0485	214295_at	0.260687	0
65	3351	RGS3	203823_at	0.440888	0
66	2877	ETV5	203349_s_at	0.395986	0
67	17784	KANK2	218418_s_at	0.424596	0
68	20922	LEF1	221558_s_at	0.293399	0
69	959	DPYSL3	201430_s_at	0.494389	0.0433828
70	9489	GATA6	210002_at	0.34825	0.0433828
71	9392	HOXA9	209905_at	0.494059	0.0433828
72	21272	ETV1	221911_at	0.400793	0.0433828
73	3189	TMOD1	203661_s_at	0.39562	0.0433828
74	1707	PRKCZ	202178_at	0.480616	0.0433828
75	3491	CA12	203963_at	0.496533	0.0433828
76	17650	SMAD3	218284_at	0.420629	0.0433828
77	5847	SMAD9	206320_s_at	0.443966	0.0433828
78	9278	CORO2B	209789_at	0.430987	0.0433828
79	17128	RAB31	217762_s_at	0.45607	0.0433828
80	3606	SC65	204078_at	0.454092	0.0433828
81	13300	CUX2	213920_at	0.229455	0.0433828
82	3190	TMOD1	203662_s_at	0.390455	0.0433828
83	4006	RABIF	204478_s_at	0.495911	0.0433828
84	10473	MGLL	211026_s_at	0.330113	0.0553421
85	9624	PMP22	210139_s_at	0.223687	0.0553421
86	2270	PRKACB	202741_at	0.416665	0.0553421
87	8686	TUBB6	209191_at	0.418703	0.0553421
88	10790	PSEN2	211373_s_at	0.486212	0.0553421
89	17130	RAB31	217764_s_at	0.474813	0.0553421
90	13974	KCNG1	214595_at	0.382511	0.0553421
91	4385	MAD1L1	204857_at	0.499564	0.0553421
92	12940	PCLO	213558_at	0.419666	0.0553421
93	12227	PPFIBP2	212841_s_at	0.484908	0.106178
94	20376	LBH	221011_s_at	0.411978	0.106178
95	1850	GGPS1	202321_at	0.48166	0.106178
96	8616	NR2F2	209121_x_at	0.485546	0.106178
97	21202	KLF4	221841_s_at	0.493552	0.106178
98	18021	LHFP	218656_s_at	0.485643	0.106178
99	3234	FZD7	203706_s_at	0.420318	0.106178
100	8387	DUSP6	208891_at	0.484159	0.106178
101	5121	PDE9A	205593_s_at	0.312511	0.106178
102	17453	SORBS1	218087_s_at	0.35896	0.106178
103	8662	GPM6B	209167_at	0.343111	0.172354
104	9429	MAGEA3	209942_x_at	0.260814	0.172354
105	18416	METRN	219051_x_at	0.471142	0.172354
106	1566	SFRP1	202037_s_at	0.44212	0.172354
107	1253	GALNT1	201724_s_at	0.491803	0.172354
108	1879	MATN2	202350_s_at	0.484017	0.172354
109	4970	MFAP3L	205442_at	0.307427	0.172354
110	13833	IFI44	214453_s_at	0.351371	0.172354
111	13047	6-Sep	213666_at	0.483667	0.172354
112	4638	FGF13	205110_s_at	0.136818	0.305408
113	3406	MMP11	203878_s_at	0.481447	0.305408
114	14253	CDKAL1	214877_at	0.41885	0.305408
115	8849	PPAP2B	209355_s_at	0.479902	0.305408
116	5667	LHX2	206140_at	0.265957	0.547898
117	19810	CSAG2 /// CSAG3	220445_s_at	0.433211	0.547898
118	8664	GPM6B	209169_at	0.415498	0.547898
119	18544	DACT1	219179_at	0.489817	0.882782
120	8663	GPM6B	209168_at	0.420404	0.882782
121	2832	BAMBI	203304_at	0.494378	0.882782
122	4212	NPTX1	204684_at	0.472989	0.882782
123	503	ACTA2	200974_at	0.495906	0.882782
124	8665	GPM6B	209170_s_at	0.444946	0.882782
125	13991	MAGEA6	214612_x_at	0.392392	0.882782
126	3489	NEBL	203961_at	0.469167	0.882782
127	592	RCN1	201063_at	0.484663	1.50188
128	8773	TFPI2	209278_s_at	0.186511	1.50188
129	13439	IFI44	214059_at	0.496672	1.50188
130	13831	TFAP2B	214451_at	0.290219	1.50188
131	9477	GABBR2	209990_s_at	0.362442	2.5382
132	1196	GJA1	201667_at	0.45264	4.40061
133	7489	DPT	207977_s_at	0.352052	4.40061
134	9946	MAGEA12	210467_x_at	0.397426	4.40061
UP in LacZ+BV
	Row	Gene ID	Gene Name	Fold Change	q-value(%)
1	18033	RAP2C	218668_s_at	2.3644	0
2	20969	HMGN5	221606_s_at	2.22235	0
3	9983	VEGFA	210512_s_at	2.36148	0
4	11835	LYPLA1	212449_s_at	2.04649	0
5	12019	KIAA0776	212633_at	2.67142	0
6	2579	TTC37	203049_s_at	2.13118	0
7	3865	RGS4	204337_at	2.31307	0
8	833	NDUFA5	201304_at	2.25776	0
9	11885	FCF1 /// MAPK1IP1L	212499_s_at	2.05926	0
10	13364	PDS5A	213984_at	2.1367	0
11	12595	GOLGA6L5 /// GOLGA6L9	213212_x_at	2.31215	0
12	3867	RGS4	204339_s_at	2.60775	0
13	17217	SLMO2	217851_s_at	2.09061	0
14	3866	RGS4	204338_s_at	3.23068	0
15	12365	FAM115A	212981_s_at	2.30808	0
16	3131	ZEB2	203603_s_at	2.3016	0
17	4650	TMEFF1	205122_at	2.05689	0
18	1904	SEC24D	202375_at	2.02711	0
19	13421	RPL37A	214041_x_at	2.90472	0
20	979	TIA1	201450_s_at	2.08097	0
21	7065	P4HA1	207543_s_at	2.13431	0
22	2417	DDIT4	202887_s_at	2.21122	0
23	14035	TMED7	214658_at	2.1216	0.227508
24	17879	C4orf43	218513_at	2.18623	0.227508
25	10519	FOLR1	211074_at	2.18508	0.362624
26	4	HSPA6	117_at	2.79956	1.45228
27	12800	HSPA6	213418_at	3.0978	3.45076
DN in LacZ+BV
	Row	Gene ID	Gene Name	Fold Change	q-value(%)
1	16938	---	217572_at	0.386475	0.362624
UP in N1D
	Row	Gene ID	Gene Name	Fold Change	q-value(%)
1	10841	IGH@ /// IGHG1 /// IGHG2 /// IGHM /// IGHV4-31 /// LOC100290146 /// LOC100294459	211430_s_at	6.46962	0
2	17267	DSG2	217901_at	5.65983	0
3	12735	ABCA5	213353_at	5.67364	0
4	5496	KCNS3	205968_at	4.54042	0
5	14696	RUNDC3B	215321_at	4.14532	0
6	2238	FMOD	202709_at	4.47215	0
7	12540	---	213156_at	6.74948	0
8	3682	CDO1	204154_at	2.87026	0
9	6099	ZNF85	206572_x_at	3.44274	0
10	3832	PROM1	204304_s_at	3.67779	0
11	9081	BMP7	209590_at	4.32479	0
12	7247	POU4F2	207725_at	6.80707	0
13	6225	XK	206698_at	2.52744	0
14	12018	STX7	212632_at	2.2683	0
15	6384	FKBP1B	206857_s_at	3.14046	0
16	9385	ITSN2	209898_x_at	2.21844	0
17	18975	RGNEF	219610_at	3.75728	0
18	194	SPARC	200665_s_at	2.51156	0
19	15628	GRM8	216255_s_at	2.15938	0
20	19050	TMEM35	219685_at	3.87709	0
21	17770	SNX10	218404_at	3.60282	0
22	13228	PRPH	213847_at	5.82799	0
23	12017	STX7	212631_at	2.16431	0
24	12127	MAOA	212741_at	2.59176	0
25	5154	CALB1	205626_s_at	2.22154	0
26	18618	TMEM185B	219253_at	2.0061	0
27	20313	ATP1A1	220948_s_at	2.17477	0
28	17583	SCPEP1	218217_at	2.77458	0
29	12982	SLIT1	213601_at	2.39422	0
30	4831	KCNJ8	205303_at	2.47247	0
31	14180	CDH6	214803_at	2.6983	0
32	2262	P4HA2	202733_at	2.40082	0
33	534	CD9	201005_at	2.62444	0
34	12542	---	213158_at	6.31881	0
35	9082	BMP7	209591_s_at	3.11514	0
36	13620	GAL	214240_at	2.64075	0
37	1614	TJP2	202085_at	2.48015	0
38	3457	MAPT	203929_s_at	2.06363	0
39	14151	TOX3	214774_x_at	2.36503	0
40	5977	DBH	206450_at	2.80894	0
41	5296	SLC27A2	205768_s_at	6.28369	0
42	4150	NR4A2	204622_x_at	2.07478	0
43	12298	C6orf26	212913_at	2.23811	0
44	15994	TOX3	216623_x_at	2.61154	0
45	16363	GRM8	216992_s_at	2.14194	0
46	4911	ZBTB20	205383_s_at	3.58465	0
47	4019	PDE4D	204491_at	2.42301	0.105346
48	10191	NPY2R	210729_at	4.50927	0.105346
49	5297	SLC27A2	205769_at	5.56342	0.105346
50	14483	TOX3	215108_x_at	2.2181	0.105346
51	6992	PIR	207469_s_at	2.66122	0.235578
52	18414	CSGALNACT1	219049_at	2.09111	0.235578
53	14839	ABCA12	215465_at	2.00281	0.235578
54	2442	ADM	202912_at	2.71236	0.235578
55	11685	NRP1	212298_at	2.60949	0.431403
56	19242	ZMAT4	219877_at	2.18803	0.431403
57	3865	RGS4	204337_at	2.31533	0.431403
58	9328	LRRN3	209841_s_at	2.21777	0.431403
59	9475	ASCL1	209988_s_at	2.4578	0.952136
60	21964	TBX2	40560_at	2.0827	0.952136
61	13149	ASCL1	213768_s_at	2.07675	0.952136
62	7718	ALK	208212_s_at	2.04528	0.952136
63	3867	RGS4	204339_s_at	2.2992	0.952136
64	9327	LRRN3	209840_s_at	2.0443	1.71876
65	5554	TNFAIP6	206026_s_at	2.66144	1.71876
66	19714	ENGASE	220349_s_at	2.0123	1.71876
67	3887	FLRT2	204359_at	2.11032	1.71876
68	4125	STC1	204597_x_at	2.25042	3.55347
69	9185	FBP1	209696_at	2.06854	3.55347
70	4123	STC1	204595_s_at	2.45981	3.55347
DN in N1D
	Row	Gene ID	Gene Name	Fold Change	q-value(%)
1	5451	RELN	205923_at	0.159539	0
2	18828	C20orf103	219463_at	0.0548345	0
3	12711	SRGAP2	213329_at	0.301458	0
4	19105	VASH2	219740_at	0.451676	0
5	9429	MAGEA3	209942_x_at	0.154349	0
6	6085	SIM2	206558_at	0.275367	0
7	11347	IGFBP5	211959_at	0.214888	0
8	14616	ANO3	215241_at	0.259151	0
9	12534	HOXA10	213150_at	0.111105	0
10	13991	MAGEA6	214612_x_at	0.234914	0
11	12281	ABR	212895_s_at	0.485764	0
12	9059	RGL1	209568_s_at	0.308402	0
13	5857	SHC3	206330_s_at	0.287662	0
14	17710	RCOR3	218344_s_at	0.420669	0
15	2952	IGFBP5	203424_s_at	0.203222	0
16	12634	SMARCA5	213251_at	0.462345	0
17	5222	TYRP1	205694_at	0.111493	0
18	11528	MCM4	212141_at	0.419498	0
19	12531	HOXA10	213147_at	0.310558	0
20	7477	C6orf54	207963_at	0.359501	0
21	19810	CSAG2 /// CSAG3	220445_s_at	0.316176	0
22	18227	ASB13	218862_at	0.469258	0
23	13204	HOXA11	213823_at	0.402849	0
24	3447	TCEA2	203919_at	0.499031	0
25	9501	MAP2	210015_s_at	0.465319	0
26	10012	PRKDC	210543_s_at	0.429084	0
27	14030	HOXA9	214651_s_at	0.406462	0
28	13818	HLX	214438_at	0.304309	0
29	4638	FGF13	205110_s_at	0.136772	0
30	3234	FZD7	203706_s_at	0.296007	0
31	3665	GPR137B	204137_at	0.491288	0
32	9489	GATA6	210002_at	0.323599	0
33	1850	GGPS1	202321_at	0.414506	0
34	17784	KANK2	218418_s_at	0.40923	0
35	3329	MRPS14	203801_at	0.480842	0
36	1851	GGPS1	202322_s_at	0.474585	0
37	714	HTRA1	201185_at	0.438779	0
38	8733	STX3	209238_at	0.250088	0
39	12000	ARID5B	212614_at	0.374851	0
40	2343	TARBP1	202813_at	0.492992	0
41	18064	RAB7L1	218699_at	0.420836	0
42	13675	KIAA0485	214295_at	0.212367	0
43	5121	PDE9A	205593_s_at	0.379103	0
44	5667	LHX2	206140_at	0.257584	0
45	6218	PDIA2	206691_s_at	0.477835	0
46	18416	METRN	219051_x_at	0.411922	0
47	2760	ATXN1	203231_s_at	0.490585	0
48	9946	MAGEA12	210467_x_at	0.170671	0
49	16498	---	217130_at	0.198334	0
50	6925	PROX1	207401_at	0.484739	0
51	20922	LEF1	221558_s_at	0.368352	0
52	13974	KCNG1	214595_at	0.287744	0
53	5174	PAX6	205646_s_at	0.393733	0
54	6321	ERBB4	206794_at	0.458422	0
55	18754	SUSD4	219389_at	0.431129	0
56	13982	MAGEA2 /// MAGEA2B	214603_at	0.429074	0
57	3952	LMO3	204424_s_at	0.227761	0
58	7079	RYR2	207557_s_at	0.477072	0
59	15131	PRKDC	215757_at	0.43997	0
60	13433	ERBB4	214053_at	0.288902	0
61	4130	DKK1	204602_at	0.137213	0
62	18021	LHFP	218656_s_at	0.443864	0
63	6222	ZNF43	206695_x_at	0.471227	0
64	8388	DUSP6	208892_s_at	0.261045	0
65	9624	PMP22	210139_s_at	0.187571	0
66	8662	GPM6B	209167_at	0.373878	0
67	12227	PPFIBP2	212841_s_at	0.438971	0
68	12650	CAMTA1	213268_at	0.473473	0
69	8665	GPM6B	209170_s_at	0.455198	0
70	21272	ETV1	221911_at	0.373147	0
71	6391	HRK	206864_s_at	0.41009	0
72	10473	MGLL	211026_s_at	0.315	0
73	17453	SORBS1	218087_s_at	0.309607	0
74	3489	NEBL	203961_at	0.387404	0
75	8389	DUSP6	208893_s_at	0.374259	0
76	12032	RFTN1	212646_at	0.454633	0
77	2877	ETV5	203349_s_at	0.423932	0.105346
78	5847	SMAD9	206320_s_at	0.425991	0.105346
79	8664	GPM6B	209169_at	0.436649	0.105346
80	13300	CUX2	213920_at	0.179119	0.105346
81	10498	KCNG1	211053_at	0.372567	0.105346
82	1879	MATN2	202350_s_at	0.460003	0.105346
83	9278	CORO2B	209789_at	0.452188	0.105346
84	11529	MCM4	212142_at	0.482286	0.105346
85	14253	CDKAL1	214877_at	0.456785	0.235578
86	5617	DISC1 /// TSNAX-DISC1	206090_s_at	0.492401	0.235578
87	8663	GPM6B	209168_at	0.473889	0.235578
88	3406	MMP11	203878_s_at	0.49508	0.235578
89	13439	IFI44	214059_at	0.454122	0.431403
90	4970	MFAP3L	205442_at	0.321517	0.431403
91	5302	F12	205774_at	0.39866	0.431403
92	592	RCN1	201063_at	0.460871	0.952136
93	13831	TFAP2B	214451_at	0.145146	0.952136
94	21202	KLF4	221841_s_at	0.477651	0.952136
95	13833	IFI44	214453_s_at	0.476995	0.952136
96	3317	SEMA3C	203789_s_at	0.478561	1.71876
97	19503	HAND1	220138_at	0.278622	1.71876
98	21134	ELK3	221773_at	0.486359	1.71876
99	4212	NPTX1	204684_at	0.422067	1.71876
100	9477	GABBR2	209990_s_at	0.36239	1.71876
101	7489	DPT	207977_s_at	0.33608	3.55347
102	503	ACTA2	200974_at	0.464104	3.55347
103	8773	TFPI2	209278_s_at	0.171248	3.55347
104	8616	NR2F2	209121_x_at	0.461175	3.55347
105	5067	AVIL	205539_at	0.462036	3.55347
106	4658	RAGE	205130_at	0.499926	3.55347
